# Evolutionary genomics of peach and almond domestication

<sup>\*,†,1</sup>Dianne Velasco, <sup>†</sup>Mallikarjuna Aradhya, <sup>‡</sup>Jeffrey Ross-Ibarra

<sup>\*</sup>Department of Plant Sciences, University of California, Davis, California 95616, <sup>†</sup>USDA-ARS National Clonal Germplasm Repository, Davis, California 95616, USA, <sup>‡</sup>Department of Plant Sciences, Center for Population Biology and Genome Center, University of California, Davis CA 95616

## Abstract

The domesticated almond [*Prunus dulcis* (L.) Batsch] and peach [*P. persica* (Mill.) D. A. Webb] originate on opposite sides of Asia and were independently domesticated approximately 5000 years ago. While inter-fertile, they possess alternate mating systems and differ in a number of morphological and physiological traits. Here we evaluated thirteen resequenced genomes of both almond and peach for signatures of selection and to better understand their relationship. Almond has ~7X the genetic diversity of peach and high genome-wide  $F_{ST}$  values support their status as separate species. We estimated a divergence time of approximately 8 Mya, coinciding with an active period of uplift in the northeast Tibetan Plateau and subsequent Asian climate change. We identify a number of regions in both genomes showing signatures of selection during domestication, and a significant overlap in candidate regions between peach and almond. While we expected gene expression in fruit to overlap with candidate selected regions, instead we find enrichment for loci highly differentiated between the species, consistent with recent fossil evidence suggesting fruit divergence long preceded domestication. Taken together this study tells us how closely related tree species evolve and are domesticated, the impact of these events on their genomes, and the utility of genomic information for long-lived species. Further exploration of this data will contribute to the genetic knowledge of these species and provide information regarding targets of selection for breeding application and further the understanding of evolution in these species.

Keywords: *Prunus persica*, peach, *Prunus dulcis*, almond, domestication, mating system

<sup>1</sup>Dept. of Plant Sciences, University of California, Davis, CA. 95616; dmvelasco@ucdavis.edu

## Introduction

*Prunus* is a large genus in the family Rosaceae with approximately two hundred species, including multiple domesticated crops such as almond, apricot, cherry, peach, and plum (Rehder, 1940; Potter, 2011). Peach [*P. persica* (Mill.) D. A. Webb] and almond [*P. dulcis* (L.) Batsch] are two of the three most economically important domesticates in *Prunus* globally, and share a number of similarities, including perenniality, precocity, and genome size and organization (Baird et al., 1994; Arús et al., 2012). However, the two species also have striking differences. While peaches are harvested for their indehiscent fleshy mesocarp, almonds are harvested for their seed, encased in a stony endocarp and a leathery, dehiscent mesocarp and exocarp (see Figure S1). And while almond, like most *Prunus* species, exhibits *S*-RNase based gametophytic self-incompatibility, peach is self-compatible (Hedrick et al., 1917; Wellington et al., 1929). Almond and peach also differ for other traits, such as life span (Gradziel, 2011), chilling requirements (Alonso et al., 2005; Dozier et al., 1990; Scorza and Okie, 1991), and adventitious root generation (Kester and Sartori, 1966).

Domestication of almond and peach occurred independently approximately 5000 BP in the Fertile Crescent and China (Zohary et al., 2012), respectively, followed by global dissemination beginning before 2300 BP (Hedrick et al., 1917; Edwards, 1975; Gradziel, 2011; Zheng et al., 2014). The few obvious domestication traits in almond are reduced toxicity, thinner endocarp, and increased seed size, while domestication in peach is characterized by diverse fruit morphology (size, color, texture, shape, etc.) and self-compatibility. Other traits not typically associated with domestication, such as precocity, adventitious rooting, graft compatibility, or tree architecture, may also have been selected during domestication or subsequent breeding (reviewed in Miller and Gross, 2011; Spiegel-Roy, 1986). Efforts to identify the wild progenitors of either almond or peach by examining species relationships within subgenus *Amygdalus* have produced inconsistent species trees and numerous polytomies (Mowrey et al., 1990; Browicz and Zohary, 1996; Ladizinsky, 1999; Aradhya et al., 2004; Bassi and Monet, 2008; Zeinalabedini et al., 2010; Verde et al., 2013). QTL-mapping approaches to investigate peach or almond domestication are thus impractical given uncertainty in the wild progenitors and the difficulties associated with long generation times. In contrast, comparatively fast and inexpensive sequencing makes population genetic approaches (cf. Ross-Ibarra et al., 2007) an attractive option, enabling the identification of domestication loci and study of the genome-wide impacts of changes in mating system.

Both domestication and mating system have been shown to shape genomic patterns of diversity in annual species (Glémin et al., 2006; Doebley et al., 2006; Hazzouri et al., 2013; Slotte et al., 2013), but the impacts of these forces on tree species remains poorly documented (McKey et al. 2010; Miller and Gross 2011; Gaut et al. 2015; but see Hamrick et al. 1992 for relevant analyses of allozyme diversity data). Mating system differences between closely related species pairs has been shown to significantly affect many aspects of genome evolution in *Arabidopsis*, *Capsella*, and *Collinsia*, including lower nucleotide diversity, higher

Table 1: *P. dulcis*, *P. persica* and outgroup species used in analyses.

| Species              | <i>n</i> | Avg. Depth | Reference           |
|----------------------|----------|------------|---------------------|
| <i>P. dulcis</i>     | 4        | 7.76       | Koepke et al., 2013 |
| <i>P. dulcis</i>     | 9        | 19.34      | this study          |
| <i>P. persica</i>    | 10       | 19.13      | Verde et al., 2013  |
| <i>P. persica</i>    | 2        | 13.78      | Ahmad et al., 2011  |
| <i>P. persica</i>    | 1        | 37.36      | this study          |
| <i>P. cerasifera</i> | 1        | 35.02      | this study          |

linkage disequilibrium (LD), and reduced effective population size ( $N_e$ ) (Hazzouri et al., 2013; Slotte et al., 2013; Wright et al., 2013). Demographic bottlenecks associated with domestication may also reduce diversity genome-wide, and selection during domestication will reduce diversity even further at specific loci (Glémin et al., 2006; Doebley et al., 2006). While studies in perennials, particularly tree fruit crops, suggest they have lost little genetic diversity due to domestication (reviewed in Miller and Gross, 2011), recent analysis of resequenced peach genomes are consistent with lower genetic diversity and higher LD across the genome compared to related wild species (Verde et al., 2013; Cao et al., 2014). No such genome-wide analysis of diversity in almonds currently exists, however, and little is known how differences in mating system affect changes in diversity during domestication.

Here we leverage both new and published genome sequences to present an evolutionary genomic analysis of the effects of domestication and mating system on diversity in both almond and peach. Understanding the impact of mating system will expand the basic knowledge of genome evolution in a perennial species pair with contrasting mating systems, and identification of candidate domestication loci will provide an opportunity to assess convergence during domestication and compare tree domestication to that of annual crops.

## Materials and Methods

### Samples

We used 13 almond and 13 peach genomes for all analyses, which included both public and newly resequenced data (Tables 1, S1). In addition, we used one peach-almond  $F_1$  hybrid and one peach with Nonpareil almond in its pedigree as checks for admixture analysis. For this study we resequenced nine almonds, one peach, an almond-peach  $F_1$  hybrid, and the plum *P. cerasifera* as an outgroup (Tables 1, S1). Fresh leaves and dormant cuttings collected from multiple sources were either desiccated with silica or stored at 4 C prior to DNA isolation. We isolated DNA following a modified CTAB method (Doyle, 1987).

Libraries for the eight almond samples were prepared at UC Davis. We quantified the sample DNA with Quanti-iT Picogreen dsDNA assay (Invitrogen,

Life Technologies) and then fragmented 1  $\mu$ g with a Bioruptor (Diagenode) for 11 cycles of 30 seconds ON and 30 seconds OFF per cycle. The resulting DNA fragment ends were then repaired with NEBNext End Repair (New England BioLabs) followed by the addition of deoxyadenosine triphosphate to the 3-prime ends with Klenow Fragment (New England BioLabs). We then ligated barcoded Illumina TrueSeq adapters (Affymetrix) to the A-tailed fragments with Quick Ligase (New England BioLabs). Between each enzymatic step we washed the DNA with Sera-Mag SpeedBeads (GE Life Sciences, Pittsburgh). The resulting libraries were quantified with a Qubit (Life Technologies) and sized using a BioAnalyzer DNA 12000 chip (Agilent Technologies). Libraries were sent to UC Berkeley (Berkeley, Qb3) for quantification by qPCR, multiplexing, and sequencing for 100 bp paired-end reads in a single HiSeq 2000 (Illumina) lane. DNA from the remaining four samples (Tables 1, S1) was submitted to BGI (Shenzhen, China) for library preparation and sequenced using 100 bp paired-end reads at their facility in Hong Kong.

## Analysis

### Quality Control and Mapping

All FASTQ files were trimmed of remnant adapter sequences using Scythe ([github.com/vsbuffalo/scythe](https://github.com/vsbuffalo/scythe)) and then further trimmed for base quality with Sickle ([github.com/najoshi/sickle](https://github.com/najoshi/sickle)) using default parameters for both. Trimmed reads were then aligned to the *P. persica* v1.0 reference ([www.rosaceae.org](http://www.rosaceae.org)) using BWA-MEM (Li, 2013) with a minimum seed length of 10 and internal seed length of 2.85. After filtering for a minimum mapping quality of 30 and base quality of 20, sequence depth averaged 15.8X (4.7X to 34.6X) in almond and 19.7X (11.2X to 35.4X in peach; Table S1, Figure S2).

### Diversity and Candidate Gene Identification

We estimated initial genotype likelihoods directly from aligned and filtered BAM files using ANGSD (Korneliussen et al., 2014). We then estimated inbreeding coefficients using *ngsF* in the *ngsTools* suite (Fumagalli et al., 2014), and recalculated genotype likelihoods incorporating our inbreeding estimates. We calculated several population genetics statistics, including pairwise nucleotide diversity ( $\theta_\pi$ ; Nei and Li, 1979), Tajima's *D* (*D*; Tajima, 1989), Fay and Wu's *H* (*H*; Fay and Wu, 2000), and Zeng's *E* (*E*; Zeng et al., 2006) using the thetaStat subprogram in ANGSD. Diversity values were estimated in overlapping 1000 bp windows with 50 bp steps, removing windows with less than 150 bp of sequence after filtering. Additionally we calculated a normalized  $\theta_\pi$  value by dividing per window  $\theta_\pi$  by mean  $\theta_\pi$  in each species. To identify candidate genes possibly selected during domestication, we filtered for genes in the lowest 5% empirical quantile of each diversity statistic. We further analyzed candidate loci for gene ontology (GO) using *P. persica* protein gene identifiers in the singular enrichment analysis tool and Fisher's exact test using default statistical options at the AgriGO website (<http://bioinfo.cau.edu.cn/agriGO/>).

## Population Comparisons

We treated peach samples and almond samples as two populations to evaluate population structure. We performed a principal component analysis (PCA) with *ngsPopGen* (Fumagalli et al., 2014) and used *NGSAdmix* (Skotte et al., 2013) to perform an admixture analysis and assign proportions of almond and peach population to individuals using  $K = 2$  through  $K = 6$  as the number of potential subpopulations. Finally, we examined population differentiation by estimating  $F_{ST}$  genome-wide and in sliding windows (1000 bp windows with a 50 bp step) after removing windows with  $< 150$ bp of sequence.

## Gene Expression

We downloaded expression tracks of peach leaf, fruit, cotyledon and embryo, and root tissue from the Istituto di Genomica Applicata (IGA) peach gbrowse interface ([http://services.appliedgenomics.org/fgb2/iga/prunus\\_public/gbrowse/prunus\\_public/](http://services.appliedgenomics.org/fgb2/iga/prunus_public/gbrowse/prunus_public/)). Expression values were multiplied by window length and then summed for each gene. We calculated the ratio of fruit expression to the mean of the non-fruit values for each gene and divided them into groups of candidate and non-candidate genes based on  $F_{ST}$ ,  $\theta_\pi$ ,  $D$ , or  $E$  values.

# Results and Discussion

## Diversity

Genome-wide nucleotide diversity ( $\theta_\pi$ ) in almond is nearly sevenfold higher than in peach (0.0186 and 0.0027, respectively), and these differences were more pronounced in non-genic regions of the genome (Tables 2 and S3). Though differences in diversity between peach and almond have been known from analyses using multiple marker systems (Mowrey et al., 1990; Byrne, 1990; Martínez-Gómez et al., 2003; Aradhya et al., 2004), this study is the first comparison of whole genome sequences using multiple diverse individuals from both species. Previous genome scans of peach found low levels of genetic diversity compared to the closely related wild species, *P. kansuensis*, *P. mira*, and *P. davidiana* (Verde et al., 2013; Cao et al., 2014). Of these, only *P. davidiana* is outcrossing, and Verde et al. (2013) found it had the greatest nucleotide diversity of the species they examined, approximately three-fold higher than domesticated peach. Despite its domesticated status, almond retains more genetic diversity than any of the peach species studied thus far, suggesting that mating system explains more of the differences in diversity among species than domestication. Finally, we observed considerable variation in diversity statistics among chromosomes in both species, including up to two-fold differences in nucleotide diversity in peach (Table S3), perhaps suggesting the relatively recent effects of selection during domestication.

Mean values of Tajima’s  $D$  were negative for both almond and peach (Table 2), suggesting a genome-wide excess of rare variants likely consistent with a

Table 2: Genome-wide, genic, and non-genic diversity statistics and neutrality test values.

| Species | Sites     | $\theta_{\pi} \times 10^3$ | <i>D</i> | <i>H</i> | <i>E</i> |
|---------|-----------|----------------------------|----------|----------|----------|
| Almond  | genome    | 18.58                      | -1.13    | -0.12    | -0.22    |
|         | genic     | 10.64                      | -1.48    | -0.03    | -0.35    |
|         | non-genic | 25.73                      | -0.82    | -0.20    | -0.10    |
| Peach   | genome    | 2.72                       | -0.49    | -0.55    | 0.14     |
|         | genic     | 1.67                       | -0.51    | -0.50    | 0.10     |
|         | non-genic | 3.62                       | -0.47    | -0.60    | 0.17     |

history of population expansion. Strongly negative values of Tajima’s *D* have recently been reported in *Populus tremuloides* Wang et al. (2016), a species also inferred to have undergone recent population expansion. While the wild progenitors of almond and peach are not definitively known, the current range of wild almond species is much larger than that of wild peach taxa, perhaps reflecting differential expansion of ancestral progenitors during interglacial periods following the Last Glacial Maximum (20 KBP; LGM).

## Inbreeding

We estimated the average inbreeding coefficient (*F*) for almond and peach to be 0.002 (0.000 to 0.027) and 0.197 (0.000 to 0.737), respectively (Table S2). Although two self-compatible almond varieties are included in this study, none of the almond samples in this study are derived from self-fertilization, supporting the low estimated inbreeding values. Peaches in general are self-compatible (with the exception of male-sterile varieties), and three of the peach varieties sampled (PP06, PP08, and PP15) have inbreeding values consistent with self pollination in the preceding generation (*F*=0.74, 0.53, and 0.56, respectively). Consistent with its known history as the result of open-pollination (Hedrick et al., 1917), the Georgia Belle peach variety sampled was estimated to have *F* = 0.

While the estimated inbreeding value for almond is not unexpected given that it is self-incompatible, the average for peach is lower than previously estimated selfing rates (*s*) of 0.5-0.86 (*F*=0.33-0.75 from  $F = \frac{s}{2-s}$ ; Fogle and Dermen 1969; Fogle 1977; Miller et al. 1989; Akagi et al. 2016). While the widely cited Miller et al. (1989) estimate was based on a single isozyme marker and is thus unable to separate self-fertilization with outcrossing to close relatives, the Akagi et al. (2016) estimate based on 5180 SNP markers is also high (*s* = 0.50 to 0.68 from *F*=0.33-0.52). Our estimates are much closer to those from Aranzana et al. (2002), who estimated *s* = 0.148 (*F*=0.08) from 35 microsatellites. In addition to differences in marker systems, these discrepancies are likely due at least in part to sampling, with estimates from outcrossed pedigrees (Aranzana et al., 2002) lower than those from landraces (Akagi et al., 2016). Broad examination of pedigree records, however, suggests our estimate

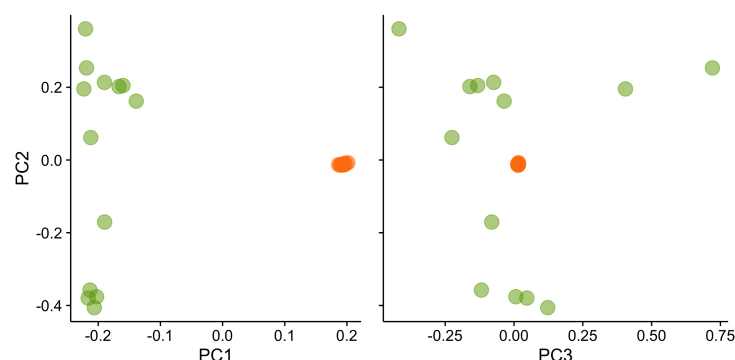

Figure 1: Principle component analysis of almond (green) and peach (orange).

of inbreeding is likely reasonable, as more than 67% of the 600 peaches in Okie et al. (1998) were the result of outcrossing (Aranzana et al., 2002), including several of the varieties sampled here Hedrick et al. (1917).

## Population structure

Genome-wide, our data are consistent with previous estimates (Aradhya et al., 2004) in finding strong genetic differentiation between almond and peach (weighted  $F_{ST} = 0.586$ , Table S3). Like  $F_{ST}$ , PCA also clearly distinguished almond from peach samples, primarily along PC1 (Figure 1). However, while PC2 and PC3 provided no further separation of peach samples they do allow further separation of almond samples (Figure 1).

Admixture analysis clearly assigns individuals to either almond or peach populations at  $K=2$  (green and orange, respectively), including the correct identification of PD01 as an almond-peach F1 hybrid (Figure 2). Peach sample PP12, in contrast, should show approximately 12.5% almond based on its pedigree (Fresnedo-Ramírez et al., 2013) but in this analysis does not differ from other New World peaches in its assigned proportions. The fact that PP12 shows fewer total variants than PP13 ('Georgia Belle'; Fresnedo-Ramírez et al. 2013) is also inconsistent with recent almond ancestry, suggesting possible errors in the recorded pedigree.

Increasing the number of clusters ( $K$ ), we find evidence for population substructure in both peach and almond (Figures 2,S4) distinguished by geographic origin or breeding status. In the admixture plot (Figure 2), within both almond and peach groups, samples at the top have more eastern origins (Central Asia or China, respectively), whereas those towards the bottom have more western origins (Spain or New World, respectively). Within peach samples the two putative subpopulations are both represented in China, as expected for the region representing the centers of origin and domestication. Almond samples from China, Pakistan, Iran, and Turkey (PD09, PD07, PD05, PD04 and PD03) group together at both  $K=4$  and  $K=5$ . At  $K=5$  a Mediterranean group of Italian and



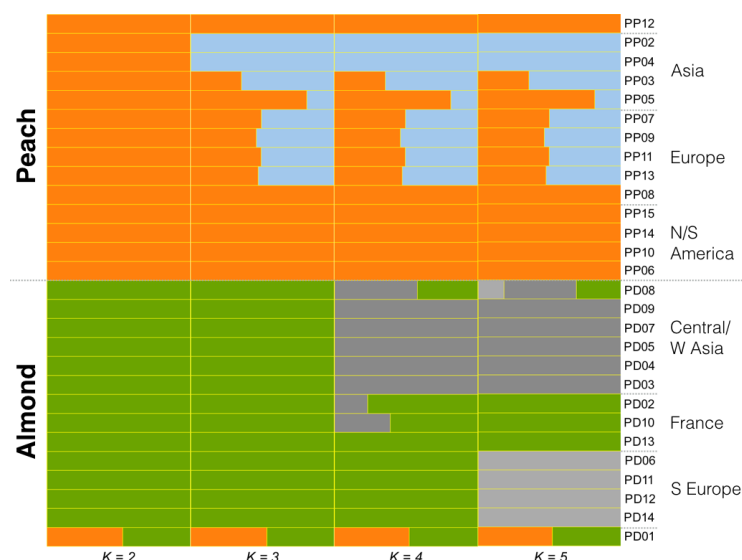

Figure 2: Admixture proportion of almond (PD) and peach (PP) for  $K=2$  through  $K=5$ . With the exception of the purported hybrids, PD01 and PP12, sample origins generally correspond with an east (top) to west (bottom) orientation for each type (Table S1)

Spanish samples (PD06, PD11, PD12, and PD14) is identified, perhaps reflecting gene flow from North Africa into Spain and Italy (Delplancke et al., 2013). At  $K=6$  PD01 forms a unique cluster and several other almonds shift assignments, suggesting an overestimation of the number of subgroups (Figure S4). Similar overall patterns of structure in peach and almond were found in previous studies (Li et al., 2013; Micheletti et al., 2015; Shen et al., 2015; Delplancke et al., 2013) as well, suggesting the use of local varieties as founders, limited exchange between Asian and European breeding programs, or recent utilization of diverse genetic resources is not reflected in the sampling. The foundations of most modern almond breeding programs began within the past century, due in part to the challenges of understanding self-incompatibility, whereas the self-compatible peach has had more widespread efforts directed towards its development for millennia (though western breeding increased or intensified only within the past 10 to 20 generations).

All of our analyses of differentiation provide unequivocal evidence distinguishing almonds from peaches, strongly supporting their status as distinct species. Previous molecular analyses have estimated a broad range of divergence times between these species, from 2.5 Mya (Vieira et al., 2008) to more than 47 Mya (Chin et al., 2014). One compelling idea for the origin of peach and almond is that climatic changes after Himalayan orogeny and Tibetan Plateau uplift led to isolation of an hypothesized ancestral species resulting in allopatric divergence of peach from almond (Chin et al., 2014). Consistent with this pos-



sibility, our estimates of  $F_{ST}$  and nucleotide diversity give a divergence time of  $\approx 8$  million years under a simple model of divergence in isolation (cf Holsinger and Weir, 2009) and assuming a mutation rate of  $\mu = 10^{-8}$  per nucleotide and a generation time of  $\approx 10$  years. This corresponds to a period of climatic change following significant geologic activity and uplift specifically in the northeastern section of the Tibetan Plateau (Fang et al., 2007; Molnar et al., 2010).

## Candidate Loci

We next scanned the genomes of both almond and peach for potential candidate genes targeted by selection during domestication.

In the lowest 5% quantile of Zeng’s  $E$ , we found 1334 and 1315 genes in peach and almond, respectively. Of these, peach and almond share 104, nearly double that expected by chance (permutation p-value 0.001) and suggesting convergence in the process of domestication. In almond, candidate genes showed enrichment for gene ontology (GO) categories related to protein amino acid phosphorylation, ATP biosynthetic processes, regulation of ADP ribosylation factor (ARF) protein signal transduction, membrane and nucleus cellular components, ATP binding, ATPase and protein tyrosine kinase activities, and zinc ion binding; candidate genes in peach showed enrichment for the GO category related to cellular catabolic processes.

We first investigated the  $S$ -locus in order to examine a genomic region known to differ between almond and peach both in sequence and function (Tao et al., 2007; Hanada et al., 2014). The  $S$ -locus, which controls gametophytic self-incompatibility in *Prunus* (reviewed in Wu et al. 2013). The  $S$ -locus haplotype block consists of two genes,  $S$ -RNase and the  $S$ -haplotype-specific F-box ( $SFB$ ), which function in the pistil and pollen, respectively. In our data, the intergenic region 3’ to both the  $S$ -RNase and  $SFB$  loci in peach shows extremely high differentiation between taxa and low nucleotide diversity in peach (Figure 3A), observations consistent with recent work showing peach having only five known  $S$ -haplotypes, two of which have identical  $SFB$  alleles (Tao et al., 2007; Hanada et al., 2014).

Windows in the lowest 5% quantile of the summary statistics investigated were generally enriched for genic regions of the genome in both taxa, but the signal in peach was weak and enrichment was not consistent across all statistics evaluated (Table S5). Nonetheless, a number of individual regions genome-wide showed strong signatures of selection. We examined 50 kb regions with contiguous windows in the bottom 5% quantile to focus our investigations of candidate genes. We focused on regions in both species for which there were overlapping regions of high  $F_{ST}$  and low  $\theta_\pi$  or Zeng’s  $E$  as these were significant for both peach and almond (permutation p-values 0-0.034; Table 3).

While many intergenic and putative regulatory regions also showed interesting patterns in diversity statistics, we examined two regions of chromosome 3 with moderate to high  $F_{ST}$  and divergent values of Zeng’s  $E$  between peach and almond, specifically low values of Zeng’s  $E$  in almond (Figures 3B, 3C). The first of these regions (Figure 3B), contains the uncharacterized gene ppa004369mg

Table 3: Permutation probability for the overlap of neutrality test or  $\theta_\pi$  selected candidate genes with high  $F_{ST}$  selected candidate genes.

| Species | Tajima's $D$ | Fay & Wu's $H$ | Zeng's $E$ | $\theta_\pi$ |
|---------|--------------|----------------|------------|--------------|
| Almond  | 0            | 0              | 0          | 0            |
| Peach   | 0.5854       | 0.3336         | 0.0342     | 0            |

(position 3:14730867..14736998; Uniprot identifier M5WRK6\_PRUPE), which has similarity to  $\gamma$ -aminobutyrate (GABA) transaminases in *Malus domestica* and multiple model species. GABA is involved in signaling and nuclear regulation of cell wall modification and cell death through repression and activation, respectively, while GABA transaminases degrade GABA in the mitochondria and are reported to have a role in pollen-pistil interactions. The second region of interest on chromosome 3 (Figure 3C), contains the uncharacterized genes ppa000048mg and ppa002236mg (position 3:18423078..18435264, Uniprot identifier M5XGZ7\_PRUPE and position 3:18441946..18446012, Uniprot identifier M5WQX1\_PRUPE, respectively). The former is in the GO category of protein N-linked glycosylation and though it has high protein BLAST similarity among many species, few were annotated. In contrast ppa002236mg had similarity to *Arabidopsis thaliana* WPP domain-interacting tail-anchored protein 1 (WIT1), which along with WIT2 functions in root tips and may facilitate lateral root initiation (Vermeer and Geldner, 2015). Further investigation of additional regions with limited homology to characterized genes or functional information may be warranted given the poor characterization of genes in these species.

Comparing peach to almond, we also identified the 1314 genes showing greatest differentiation (top 5% quantile of  $F_{ST}$ ). While these genes were enriched for a number of GO categories (Table S6), no clear patterns emerged. Given the importance of fruit morphology in peach, however, we hypothesized that selection during domestication and subsequent breeding may have targeted genes primarily expressed in fruit tissue. To test this hypothesis, we compared gene expression in peach as a ratio of fruit expression over mean expression in non-fruit tissues (Table S7 and Figure 4). Contrary to our expectations, we found no differences in expression for candidate domestication genes than for random sets of genes (Table S7). Genes showing strong differentiation (top 5% quantile  $F_{ST}$  between almond and peach, however, had significantly higher expression in fruit (permutation p-value 0.016; Table S7). This result, combined with observed similarities in endocarp morphology between modern peach and a recently described 2.6 Mya fossil of *P. kunmingensis* (Su et al., 2015), suggests that much of the observed difference in fruit morphology between peach and almond predated domestication.

## Conclusions

One of the primary questions regarding domestication of perennial crops, particularly tree crops, is its genetic basis (Miller and Gross, 2011). Here we have

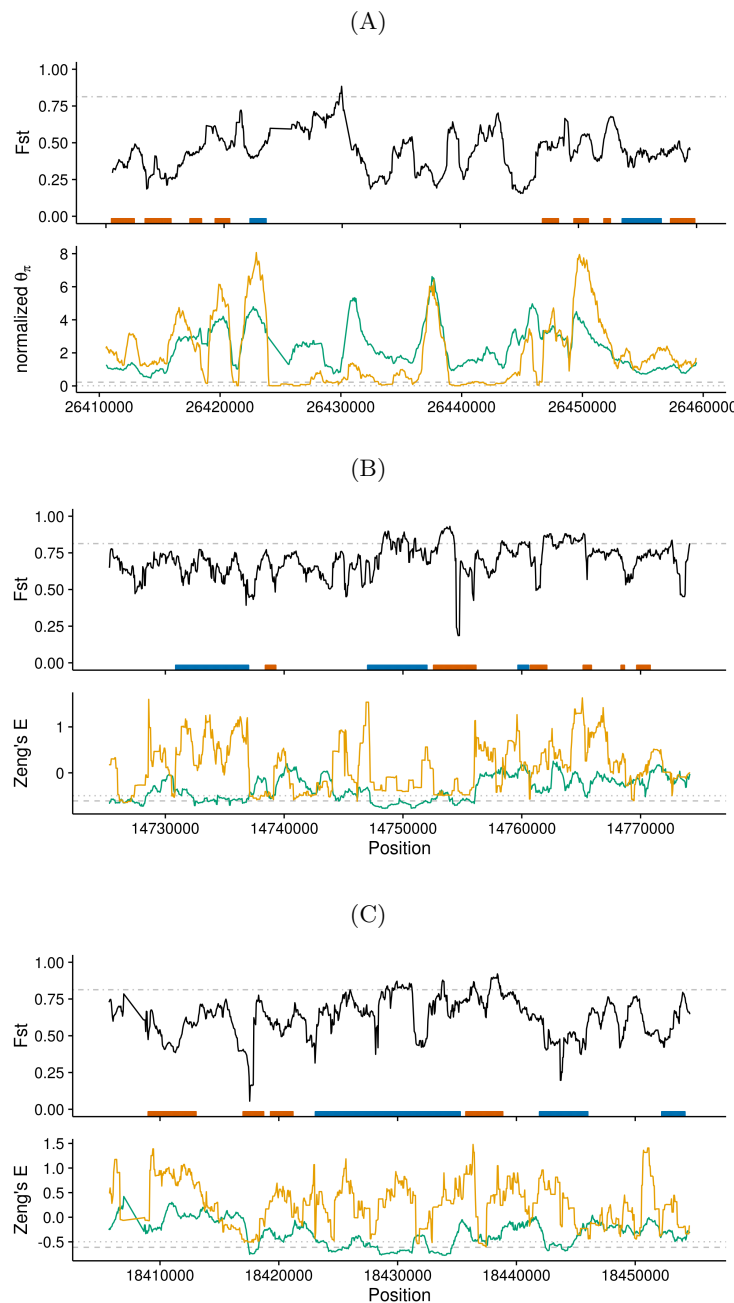

Figure 3: Select 50 Kb windows of the genome with high divergence ( $F_{ST}$ ) and either low normalized  $\theta_\pi$  (A) or Zeng's E (B,C) of almond (green) and peach (orange). Genes annotated in the peach reference genome are represented in the  $F_{ST}$  plot by boxes colored by orientation (blue = forward, red = reverse). **A.** *S*-locus divergence and diversity with *S*-locus genes, *SFB* (blue) and *S*-RNase (red), located on opposite sides of the central gap. Diversity in peach is drastically reduced immediately 3' to *SFB* but only somewhat reduced 3' to *S*-RNase as might be expected for a linked locus. **B & C.** Loci of interest on chromosome 3.

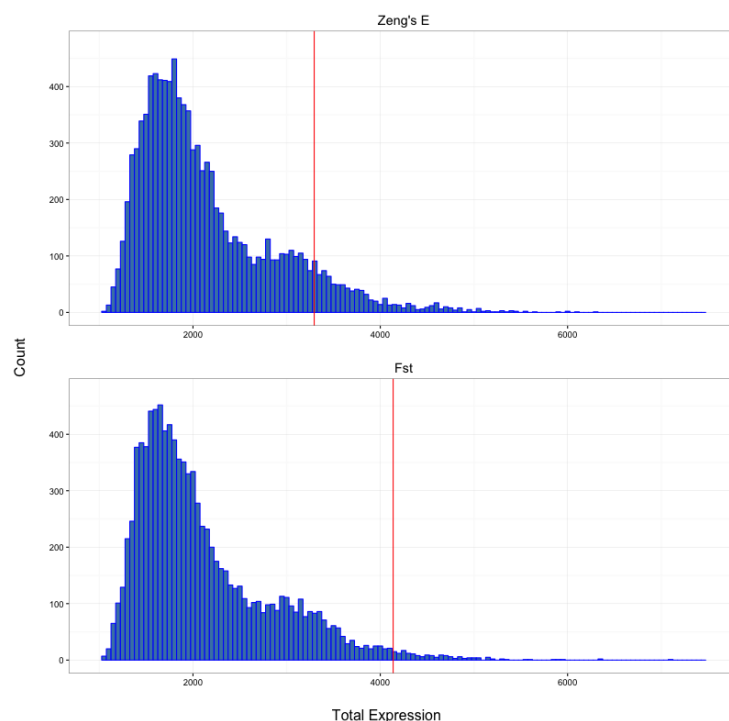

Figure 4: Peach gene expression as a ratio of fruit expression to mean non-fruit tissue expression for candidate and all non-candidate peach genes based on the bottom 5% of Zeng's  $E$  (top) and top 5% of  $F_{ST}$  (bottom).

examined two closely related domesticated tree species with alternate mating systems in an attempt to tease apart the genomic signatures of domestication and mating system and better understand these processes in perennial species. In addition to demonstrating the importance of mating system in determining overall patterns of genetic diversity, our results identify numerous genes and genomic regions showing evidence of selection, provide evidence of convergence in the domestication of almond and peach, and show that genes highly expressed in the fruit were not preferentially targeted during domestication but likely selected much earlier during species divergence. Finally, the high-coverage sequence we provide for a number of important cultivars may be useful to breeders and geneticists in identifying the causal basis of quantitative trait loci or developing marker sets for marker-assisted selection or genomic prediction.

## Acknowledgments

Support for DV provided by the McDonald Endowment for UC Davis Plant Sciences Graduate Student Research Assistantship and the Almond Board of California (ABC; grant HORT16-Aradhya/Ledbetter). Resequencing funded by the ABC (grant HORT16-Aradhya/ Ledbetter) and a Henry A. Jastro Research Fellowship. Resequencing funded by the Henry A. Jastro Research Fellowship used the Vincent J. Coates Genomics Sequencing Laboratory at UC Berkeley, supported by NIH S10 Instrumentation Grants S10RR029668 and S10RR027303.

## References

- Ahmad, R., Parfitt, D. E., Fass, J., Ogundiwin, E., Dhingra, A., Gradziel, T. M., Lin, D., Joshi, N. A., Martinez-Garcia, P. J., and Crisosto, C. H. (2011). Whole genome sequencing of peach (*Prunus persica* L.) for SNP identification and selection. *BMC Genomics*, 12(1):569.
- Akagi, T., Hanada, T., Yaegaki, H., Gradziel, T. M., and Tao, R. (2016). Genome-wide view of genetic diversity reveals paths of selection and cultivar differentiation in peach domestication. *DNA Research*, page dsw014.
- Alonso, J., Ansón, J., Espiau, M., and Socias i Company, R. (2005). Determination of endodormancy break in almond flower buds by a correlation model using the average temperature of different day intervals and its application to the estimation of chill and heat requirements and blooming date. *Journal of the American Society for Horticultural Science*, 130(3):308–318.
- Aradhya, M. K., Weeks, C., and Simon, C. J. (2004). Molecular characterization of variability and relationships among seven cultivated and selected wild species of *Prunus* L. using amplified fragment length polymorphism. *Scientia Horticulturae*, 103(1):131–144.
- Aranzana, M., Garcia-Mas, J., Carbo, J., and Arús, P. (2002). Development and variability analysis of microsatellite markers in peach. *Plant Breeding*, 121(1):87–92.
- Arús, P., Verde, I., Sosinski, B., Zhebentyayeva, T., and Abbott, A. G. (2012). The peach genome. *Tree Genetics & Genomes*, 8(3):531–547.
- Baird, W. V., Estager, A. S., and Wells, J. K. (1994). Estimating nuclear DNA content in peach and related diploid species using laser flow cytometry and DNA hybridization. *Journal of the American Society for Horticultural Science*, 119(6):1312–1316.
- Bassi, D. and Monet, R. (2008). Botany and taxonomy. In Layne, D. R. and Bassi, D., editors, *The Peach: Botany, Production and Uses*, chapter 1, pages 1–36. CABI, Oxfordshire, UK.
- Browicz, K. and Zohary, D. (1996). The genus *Amygdalus* L. (Rosaceae): species relationships, distribution and evolution under domestication. *Genetic Resources and Crop Evolution*, 43(3):229–247.
- Byrne, D. (1990). Isozyme variability in four diploid stone fruits compared with other woody perennial plants. *Journal of Heredity*, 81(1):68–71.
- Cao, K., Zheng, Z., Wang, L., Liu, X., Zhu, G., Fang, W., Cheng, S., Zeng, P., Chen, C., Wang, X., et al. (2014). Comparative population genomics reveals the domestication history of the peach, *Prunus persica*, and human influences on perennial fruit crops. *Genome biology*, 15(7):415.

- Chin, S.-W., Shaw, J., Haberle, R., Wen, J., and Potter, D. (2014). Diversification of almonds, peaches, plums and cherries—molecular systematics and biogeographic history of *Prunus* (Rosaceae). *Molecular phylogenetics and evolution*, 76:34–48.
- Delplancke, M., Alvarez, N., Benoit, L., Espíndola, A., I Joly, H., Neuenschwander, S., and Arrigo, N. (2013). Evolutionary history of almond tree domestication in the mediterranean basin. *Molecular ecology*, 22(4):1092–1104.
- Doebley, J. F., Gaut, B. S., and Smith, B. D. (2006). The molecular genetics of crop domestication. *Cell*, 127(7):1309–1321.
- Doyle, J. J. (1987). A rapid DNA isolation procedure for small quantities of fresh leaf tissue. *Phytochem Bull*, 19:11–15.
- Dozier, W., Powell, A., Caylor, A., McDaniel, N., Carden, E., and McGuire, J. (1990). Hydrogen cyanamide induces budbreak of peaches and nectarines following inadequate chilling. *HortScience*, 25(12):1573–1575.
- Edwards, S. (1975). The almond industry of Mexico. Master’s thesis, Oregon State University.
- Fang, X., Zhang, W., Meng, Q., Gao, J., Wang, X., King, J., Song, C., Dai, S., and Miao, Y. (2007). High-resolution magnetostratigraphy of the Neogene Huaitoutala section in the eastern Qaidam Basin on the NE Tibetan Plateau, Qinghai Province, China and its implication on tectonic uplift of the NE Tibetan Plateau. *Earth and Planetary Science Letters*, 258(1):293–306.
- Fay, J. C. and Wu, C.-I. (2000). Hitchhiking under positive Darwinian selection. *Genetics*, 155(3):1405–1413.
- Fogle, H. (1977). Self-pollination and its implications in peach improvement. *Fruit Varieties Journal*.
- Fogle, H. W. and Dermen, H. (1969). Genetic and chimera constitution of three leaf variegations in the peach. *Journal of Heredity*, 60(6):323–328.
- Fresnedo-Ramírez, J., Martínez-García, P. J., Parfitt, D. E., Crisosto, C. H., and Gradziel, T. M. (2013). Heterogeneity in the entire genome for three genotypes of peach [*Prunus persica* (L.) Batsch] as distinguished from sequence analysis of genomic variants. *BMC genomics*, 14(1):750.
- Fumagalli, M., Vieira, F. G., Linderöth, T., and Nielsen, R. (2014). *ngsTools*: methods for population genetics analyses from next-generation sequencing data. *Bioinformatics*, 30(10):1486–1487.
- Gaut, B. S., Díez, C. M., and Morrell, P. L. (2015). Genomics and the contrasting dynamics of annual and perennial domestication. *Trends in Genetics*.



- Glémin, S., Bazin, E., and Charlesworth, D. (2006). Impact of mating systems on patterns of sequence polymorphism in flowering plants. *Proceedings of the Royal Society B: Biological Sciences*, 273(1604):3011–3019.
- Gradziel, T. M. (2011). Origin and dissemination of almond. *Horti Rev*, 38:23–81.
- Hamrick, J. L., Godt, M. J. W., and Sherman-Broyles, S. L. (1992). Factors influencing levels of genetic diversity in woody plant species. In *Population genetics of forest trees*, pages 95–124. Springer.
- Hanada, T., Watari, A., Kibe, T., Yamane, H., Wunsch Blanco, A., Gradziel, T. M., Sasabe, Y., Yaegaki, H., Yamaguchi, M., and Tao, R. (2014). Two novel self-compatible *S* haplotypes in peach (*Prunus persica*). *Journal of the Japanese Society for Horticultural Science*, 83(3):203–213.
- Hazzouri, K. M., Escobar, J. S., Ness, R. W., Killian Newman, L., Randle, A. M., Kalisz, S., and Wright, S. I. (2013). Comparative population genomics in *Collinsia* sister species reveals evidence for reduced effective population size, relaxed selection, and evolution of biased gene conversion with an ongoing mating system shift. *Evolution*, 67(5):1263–1278.
- Hedrick, U. P., Howe, G. H., Taylor, O. M., and Tubergen, C. B. (1917). *The Peaches of New York*. JB Lyon Company, Albany, NY.
- Holsinger, K. E. and Weir, B. S. (2009). Genetics in geographically structured populations: defining, estimating and interpreting FST. *Nature Reviews Genetics*, 10(9):639–650.
- Kester, D. E. and Sartori, E. (1966). Rooting of cuttings in populations of peach (*Prunus persica* l.), almond (*Prunus amygdalus* batsch) and their F1 hybrids. In *Proceedings of the American Society for Horticultural Science*, volume 88, pages 219–223.
- Koepke, T., Schaeffer, S., Harper, A., Dicenta, F., Edwards, M., Henry, R. J., Møller, B. L., Meisel, L., Oraguzie, N., Silva, H., et al. (2013). Comparative genomics analysis in Prunoideae to identify biologically relevant polymorphisms. *Plant Biotechnology Journal*, 11(7):883–893.
- Korneliussen, T. S., Albrechtsen, A., and Nielsen, R. (2014). ANGSD: analysis of next generation sequencing data. *BMC Bioinformatics*, 15(1):356.
- Ladizinsky, G. (1999). On the origin of almond. *Genetic Resources and Crop Evolution*, 46(2):143–147.
- Li, H. (2013). Aligning sequence reads, clone sequences and assembly contigs with BWA-MEM. *arXiv preprint arXiv:1303.3997*.

- Li, X.-w., Meng, X.-q., Jia, H.-j., Yu, M.-l., Ma, R.-j., Wang, L.-r., Cao, K., Shen, Z.-j., Niu, L., Tian, J.-b., Chen, M.-j., Xie, M., Arus, P., Gao, Z.-s., and Aranzana, M. J. (2013). Peach genetic resources: diversity, population structure and linkage disequilibrium. *BMC genetics*, 14(1):1.
- Martínez-Gómez, P., Arulsekhar, S., Potter, D., and Gradziel, T. M. (2003). An extended interspecific gene pool available to peach and almond breeding as characterized using simple sequence repeat (SSR) markers. *Euphytica*, 131(3):313–322.
- McKey, D., Elias, M., Pujol, B., and Duputié, A. (2010). The evolutionary ecology of clonally propagated domesticated plants. *New Phytologist*, 186(2):318–332.
- Micheletti, D., Dettori, M. T., Micali, S., Aramini, V., Pacheco, I., Linge, C. D. S., Foschi, S., Banchi, E., Barreneche, T., Quilot-Turion, B., et al. (2015). Whole-genome analysis of diversity and SNP-major gene association in peach germplasm. *PloS one*, 10(9):e0136803.
- Miller, A. J. and Gross, B. L. (2011). From forest to field: perennial fruit crop domestication. *American Journal of Botany*, 98(9):1389–1414.
- Miller, P. J., Parfitt, D. E., and Weinbaum, S. A. (1989). Outcrossing in peach. *HortScience*, 24(2):359–360.
- Molnar, P., Boos, W. R., and Battisti, D. S. (2010). Orographic controls on climate and paleoclimate of Asia: thermal and mechanical roles for the Tibetan Plateau. *Annual Review of Earth and Planetary Sciences*, 38(1):77.
- Mowrey, B. D., Werner, D. J., and Byrne, D. H. (1990). Isozyme survey of various species of *Prunus* in the subgenus *Amygdalus*. *Scientia Horticulturae*, 44(3):251–260.
- Nei, M. and Li, W.-H. (1979). Mathematical model for studying genetic variation in terms of restriction endonucleases. *Proceedings of the National Academy of Sciences*, 76(10):5269–5273.
- Okie, W. R. et al. (1998). Handbook of peach and nectarine varieties. Performance in the Southeastern United States and index of names. *Agriculture Handbook (Washington)*, (714).
- Potter, D. (2011). *Prunus*. In *Wild Crop Relatives: Genomic and Breeding Resources*, pages 129–145. Springer.
- Rehder, A. (1940). *Manual of Cultivated Trees and Shrubs*. Macmillan Company, New York.
- Ross-Ibarra, J., Morrell, P. L., and Gaut, B. S. (2007). Plant domestication, a unique opportunity to identify the genetic basis of adaptation. *Proceedings of the National Academy of Sciences*, 104(suppl 1):8641–8648.

- Scorza, R. and Okie, W. R. (1991). Peaches (*Prunus*). *Acta Horticulturae*, 290:177–234.
- Shen, Z., Ma, R., Cai, Z., Yu, M., and Zhang, Z. (2015). Diversity, population structure, and evolution of local peach cultivars in china identified by simple sequence repeats. *Genetics and molecular research: GMR*, 14(1):101.
- Skotte, L., Korneliussen, T. S., and Albrechtsen, A. (2013). Estimating individual admixture proportions from next generation sequencing data. *Genetics*, 195(3):693–702.
- Slotte, T., Hazzouri, K. M., Ågren, J. A., Koenig, D., Maumus, F., Guo, Y.-L., Steige, K., Platts, A. E., Escobar, J. S., Newman, L. K., Wang, W., Mandáková, T., Vello, E., Smith, L. M., Henz, S. R., Steffen, J., Takuno, S., Brandvain, Y., Coop, G., Andolfatto, P., Hu, T. T., Blanchette, M., Clark, R. M., Quesneville, H., Nordborg, M., Gaut, B. S., Lysak, M. A., Jenkins, J., Grimwood, J., Chapman, J., Prochnik, S., Shu, S., Rokhsar, D., Schmutz, J., Weigel, D., and Wright, S. I. (2013). The *Capsella rubella* genome and the genomic consequences of rapid mating system evolution. *Nature Genetics*, 45(7):831–835.
- Spiegel-Roy, P. (1986). Domestication of fruit trees. *Developments in agricultural and managed-forest ecology*, 16:201–211.
- Su, T., Wilf, P., Huang, Y., Zhang, S., and Zhou, Z. (2015). Peaches preceded humans: Fossil evidence from SW China. *Scientific Reports*, 5:16794–16794.
- Tajima, F. (1989). Statistical method for testing the neutral mutation hypothesis by DNA polymorphism. *Genetics*, 123(3):585–595.
- Tao, R., Watari, A., Hanada, T., Habu, T., Yaegaki, H., Yamaguchi, M., and Yamane, H. (2007). Self-compatible peach (*Prunus persica*) has mutant versions of the *S* haplotypes found in self-incompatible *Prunus* species. *Plant Molecular Biology*, 63(1):109–123.
- Verde, I., Abbott, A. G., Scalabrin, S., Jung, S., Shu, S., Marroni, F., Zhebentyayeva, T., Dettori, M. T., Grimwood, J., Cattonaro, F., Zuccolo, A., Rossini, L., Jenkins, J., Vendramin, E., Meisel, L. A., Decroocq, V., Sosinski, B., Prochnik, S., Mitros, T., Policriti, A., Cipriani, G., Dondini, L., Ficklin, S., Goodstein, D. M., Xuan, P., Del Fabbro, C., Aramini, V., Copetti, D., Gonzalez, S., Horner, D. S., Falchi, R., Lucas, S., Mica, E., Maldonado, J., Lazzari, B., Bielenberg, D., Pirona, R., Miculan, M., Barakat, A., Testolin, R., Stella, A., Tartarini, S., Tonutti, P., Arús, P., Orellana, A., Wells, C., Main, D., Vizzotto, G., Silva, H., Salamini, F., Schmutz, J., Morgante, M., and Rokhsar, D. S. (2013). The high-quality draft genome of peach (*Prunus persica*) identifies unique patterns of genetic diversity, domestication and genome evolution. *Nature Genetics*, 45(5):487–494.

- Vermeer, J. E. and Geldner, N. (2015). Lateral root initiation in arabidopsis thaliana: a force awakens. *F1000prime reports*, 7.
- Vieira, J., Fonseca, N. A., Santos, R. A., Habu, T., Tao, R., and Vieira, C. P. (2008). The number, age, sharing and relatedness of *S*-locus specificities in *Prunus*. *Genetics research*, 90(01):17–26.
- Wang, J., Street, N. R., Scofield, D. G., and Ingvarsson, P. K. (2016). Natural selection and recombination rate variation shape nucleotide polymorphism across the genomes of three related populus species. *Genetics*, pages 1185–1200.
- Wellington, R., Stout, A. B., Einset, O., and Van Alstyne, L. M. (1929). Pollination of fruit trees. *Bulletin of the New York State Agricultural Experiment Station*, 577:3–54.
- Wright, S. I., Kalisz, S., and Slotte, T. (2013). Evolutionary consequences of self-fertilization in plants. *Proceedings of the Royal Society of London B: Biological Sciences*, 280(1760):20130133.
- Wu, J., Gu, C., Khan, M. A., Wu, J., Gao, Y., Wang, C., Korban, S. S., and Zhang, S. (2013). Molecular determinants and mechanisms of gametophytic self-incompatibility in fruit trees of Rosaceae. *Critical Reviews in Plant Sciences*, 32(1):53–68.
- Zeinalabedini, M., Khayam-Nekoui, M., Grigorian, V., Gradziel, T., and Martinez-Gomez, P. (2010). The origin and dissemination of the cultivated almond as determined by nuclear and chloroplast SSR marker analysis. *Scientia Horticulturae*, 125(4):593–601.
- Zeng, K., Fu, Y.-X., Shi, S., and Wu, C.-I. (2006). Statistical tests for detecting positive selection by utilizing high-frequency variants. *Genetics*, 174(3):1431–1439.
- Zheng, Y., Crawford, G. W., and Chen, X. (2014). Archaeological evidence for peach (*Prunus persica*) cultivation and domestication in China. *PloS One*, 9(9):e106595.
- Zohary, D., Hopf, M., and Weiss, E. (2012). *Domestication of Plants in the Old World*. Oxford University Press, Oxford.

Table S1: Detailed sample information for *P. dulcis*, *P. persica*, and related species used in analyses.

| Species                            | Sample ID | Accession and/or Cultivar        | Avg. Depth | Origin     | Source                  | Ref            |
|------------------------------------|-----------|----------------------------------|------------|------------|-------------------------|----------------|
| <i>P. dulcis</i>                   | PD01      | DPRU 2578.2, #53                 | 30.46      | Ukraine    | USDA NCGR               | 1 <sup>y</sup> |
|                                    | PD02      | Tardy Nonpareil                  | 34.59      | USA        | UCD                     | 1 <sup>y</sup> |
|                                    | PD03      | DPRU 1791.3, BE-1609             | 17.93      | Turkey     | USDA NCGR               | 1 <sup>z</sup> |
|                                    | PD04      | DPRU 2374.12                     | 16.77      | Iran       | USDA NCGR               | 1 <sup>z</sup> |
|                                    | PD05      | DPRU 1456.4, Badam               | 15.90      | Pakistan   | USDA NCGR               | 1 <sup>z</sup> |
|                                    | PD06      | DPRU 2301, Tuono                 | 17.23      | Italy      | USDA NCGR               | 1 <sup>z</sup> |
|                                    | PD07      | DPRU 1462.2                      | 19.38      | Pakistan   | USDA NCGR               | 1 <sup>z</sup> |
|                                    | PD08      | DPRU 1207.2                      | 14.47      | Uzbekistan | USDA NCGR               | 1 <sup>z</sup> |
|                                    | PD09      | DPRU 2331.9                      | 17.17      | China      | USDA NCGR               | 1 <sup>z</sup> |
|                                    | PD10      | DPRU 0210, Languedoc             | 20.63      | France     | USDA NCGR               | 1 <sup>z</sup> |
|                                    | PD11      | S3067                            | 6.64       | Spain      | SRR765861               | 2              |
|                                    | PD12      | D05-187                          | 4.72       | Spain      | SRR765850               | 2              |
|                                    | PD13      | Lauranne                         | 13.00      | France     | SRR765838               | 2              |
|                                    | PD14      | Ramillete                        | 6.69       | Spain      | SRR765679               | 2              |
| <i>P. persica</i>                  | PP02      | Yumyeong                         | 22.37      | Korea      | SRR502994               | 3              |
|                                    | PP03      | Shenzhou Mitao                   | 11.19      | N China    | SRR502993,<br>SRR502992 | 3              |
|                                    | PP04      | Sahua Hong Pantao                | 14.46      | S China    | SRR502991,<br>SRR502990 | 3              |
|                                    | PP05      | Quetta                           | 12.64      | Pakistan   | SRR502989,<br>SRR502987 | 3              |
|                                    | PP06      | Oro A                            | 25.78      | Brazil     | SRR502986               | 3              |
|                                    | PP07      | IF7310828                        | 12.75      | Italy      | SRR503001,<br>SRR503000 | 3              |
|                                    | PP08      | GF305                            | 18.68      | France     | SRR502983               | 3              |
|                                    | PP09      | F <sub>1</sub> Contender × Ambra | 15.57      | Italy      | SRR502997               | 3              |
|                                    | PP10      | Earligold                        | 35.40      | USA        | SRR502996,<br>SRR502995 | 3              |
|                                    | PP11      | Bolero                           | 22.42      | Italy      | SRR501836               | 3              |
|                                    | PP12      | F8,1-42                          | 11.88      | USA        | SRR068361               | 4              |
|                                    | PP13      | Georgia Belle                    | 13.13      | USA        | SRR068359               | 4              |
|                                    | PP14      | Dr. Davis                        | 14.44      | USA        | SRR068360               | 4              |
|                                    | PP15      | Lovell                           | 37.36      | USA        | UCD                     | 1 <sup>y</sup> |
|                                    | PC01      | DPRU 0579, Myrobalan             | 35.02      | USA        | USDA NCGR               | 1 <sup>y</sup> |
| <i>P. cerasifera</i><br>(outgroup) |           |                                  |            |            |                         |                |

**References:** <sup>1</sup> this study; <sup>2</sup> Koepke et al., 2013; <sup>3</sup> Verde et al., 2013; <sup>4</sup> Ahmad et al., 2011; **Abbreviations:** UCD - University of California, Davis; USDA NCGR - United States Department of Agriculture National Clonal Germplasm Repository (Davis); **Reference:** Resequencing of samples in this study performed at BGI<sup>y</sup> or UC Berkeley<sup>z</sup>.

Table S2: Inbreeding values of peach and almond samples.

| <b>Peach</b> | <i>F</i>     | <b>Almond</b> | <i>F</i>     |
|--------------|--------------|---------------|--------------|
| PP02         | 0.072        | PD02          | 0.000        |
| PP03         | 0.222        | PD03          | 0.002        |
| PP04         | 0.116        | PD04          | 0.000        |
| PP05         | 0.001        | PD05          | 0.002        |
| PP06         | 0.533        | PD06          | 0.000        |
| PP07         | 0.081        | PD07          | 0.000        |
| PP08         | 0.737        | PD08          | 0.000        |
| PP09         | 0.000        | PD09          | 0.000        |
| PP10         | 0.064        | PD10          | 0.000        |
| PP11         | 0.000        | PD11          | 0.000        |
| PP13         | 0.000        | PD12          | 0.027        |
| PP14         | 0.176        | PD13          | 0.000        |
| PP15         | 0.557        | PD14          | 0.000        |
| <i>Mean</i>  | <i>0.197</i> | <i>Mean</i>   | <i>0.002</i> |

Table S3: Mean  $F_{ST}$ , diversity statistics, and neutrality test values.

| Region    | $F_{ST}$ | $\theta_{\pi} \times 10^3$ | Almond |        |        | $\theta_{\pi} \times 10^3$ | Peach  |        |       |
|-----------|----------|----------------------------|--------|--------|--------|----------------------------|--------|--------|-------|
|           |          |                            | $D$    | $H$    | $E$    |                            | $D$    | $H$    | $E$   |
| genome    | 0.586    | 18.374                     | -1.150 | -0.115 | -0.223 | 2.700                      | -0.492 | -0.561 | 0.139 |
| genic     | 0.606    | 10.570                     | -1.489 | -0.030 | -0.351 | 1.667                      | -0.510 | -0.497 | 0.101 |
| non-genic | 0.568    | 25.668                     | -0.834 | -0.195 | -0.103 | 3.611                      | -0.476 | -0.617 | 0.173 |
| Chr 1     | 0.605    | 16.706                     | -1.266 | -0.154 | -0.231 | 2.022                      | -0.559 | -0.513 | 0.096 |
| Chr 2     | 0.557    | 20.222                     | -1.094 | -0.081 | -0.227 | 4.014                      | -0.462 | -0.579 | 0.158 |
| Chr 3     | 0.593    | 16.858                     | -1.130 | -0.116 | -0.217 | 2.455                      | -0.417 | -0.557 | 0.155 |
| Chr 4     | 0.558    | 21.779                     | -0.994 | -0.110 | -0.187 | 3.707                      | -0.326 | -0.565 | 0.186 |
| Chr 5     | 0.589    | 17.602                     | -1.184 | -0.092 | -0.243 | 2.352                      | -0.544 | -0.593 | 0.139 |
| Chr 6     | 0.611    | 16.042                     | -1.177 | -0.125 | -0.225 | 2.121                      | -0.512 | -0.533 | 0.119 |
| Chr 7     | 0.586    | 18.793                     | -1.166 | -0.105 | -0.232 | 2.613                      | -0.461 | -0.575 | 0.154 |
| Chr 8     | 0.575    | 19.972                     | -1.119 | -0.097 | -0.225 | 2.593                      | -0.651 | -0.635 | 0.137 |



Table S4: Nucleotide diversity of candidate versus non-candidate genes identified in the lowest 5% quantile of different summary statistics.

| Statistic      | Almond                     |               | Peach                      |               |
|----------------|----------------------------|---------------|----------------------------|---------------|
|                | $\theta_{\pi} \times 10^3$ |               | $\theta_{\pi} \times 10^3$ |               |
|                | Candidate                  | Non-candidate | Candidate                  | Non-candidate |
| Tajima's D     | 5.535                      | 12.189        | 1.407                      | 1.860         |
| Zeng's E       | 5.534                      | 12.189        | 0.886                      | 1.888         |
| Fay & Wu's H   | 13.881                     | 11.749        | 0.951                      | 1.884         |
| $F_{ST}$       | 11.230                     | 11.883        | 1.165                      | 1.877         |
| $\theta_{\pi}$ | 5.252                      | 12.204        | 0.542                      | 1.906         |

Table S5: Number and mean summary statistic values of non-genic and genic windows (NGW and GW, respectively) in the lowest 5% quantile for Tajima's D, Zeng's E, Fay & Wu's H, and  $\theta_\pi$  for each species. The same information is shown for windows in the top and bottom 5% quantiles for  $F_{ST}$ . Also included are the number of genes represented by genic windows and the ratio of genic to non-genic windows.

| Statistic    |           | NGW    | Mean       | GW     | Genes | Mean       | GW:NGW  |
|--------------|-----------|--------|------------|--------|-------|------------|---------|
| Tajima's D   | almond    | 17112  | -2.3015    | 203826 | 10365 | -2.3302    | 11.9113 |
|              | peach     | 126724 | -2.0946    | 93781  | 6000  | -2.0870    | 0.7400  |
| Zeng's E     | almond    | 12969  | -0.6501    | 195992 | 11385 | -0.6606    | 15.1123 |
|              | peach     | 81258  | -0.5535    | 129763 | 10706 | -0.5494    | 1.5969  |
| Fay & Wu's H | almond    | 127429 | -1.0246    | 38095  | 4029  | -1.0325    | 0.2990  |
|              | peach     | 107582 | -2.9458    | 105573 | 8526  | -3.0076    | 0.9813  |
| $\theta_\pi$ | almond    | 13360  | 0.0033     | 188322 | 9647  | 0.0035     | 14.0960 |
|              | peach     | 58287  | 8.6123e-06 | 124818 | 9927  | 7.3075e-06 | 2.1414  |
| $F_{ST}$     | top 5%    | 73406  | 0.8716     | 88596  | 7400  | 0.8587     | 1.2069  |
|              | bottom 5% | 51018  | 0.1739     | 35688  | 4692  | 0.1622     | 0.6995  |

Table S6: Significant GO terms for  $F_{ST}$  candidate genes based on top 5% quantile.

| GO acc     | Type | Term                                                            | Query Item | BG Item | p-value | FDR     |
|------------|------|-----------------------------------------------------------------|------------|---------|---------|---------|
| GO:0030554 | F    | adenyl nucleotide binding                                       | 153        | 2225    | 7.7e-07 | 9.3e-05 |
| GO:0005524 | F    | ATP binding                                                     | 146        | 2104    | 8.8e-07 | 9.3e-05 |
| GO:0005515 | F    | protein binding                                                 | 122        | 1634    | 2.5e-07 | 9.3e-05 |
| GO:0001883 | F    | purine nucleoside binding                                       | 153        | 2225    | 7.7e-07 | 9.3e-05 |
| GO:0001882 | F    | nucleoside binding                                              | 153        | 2226    | 7.9e-07 | 9.3e-05 |
| GO:0032559 | F    | adenyl ribonucleotide binding                                   | 146        | 2104    | 8.8e-07 | 9.3e-05 |
| GO:0017076 | F    | purine nucleotide binding                                       | 162        | 2437    | 2.3e-06 | 0.00017 |
| GO:0016772 | F    | transferase activity, transferring phosphorus-containing groups | 101        | 1347    | 2.4e-06 | 0.00017 |
| GO:0032555 | F    | purine ribonucleotide binding                                   | 155        | 2313    | 2.6e-06 | 0.00017 |
| GO:0032553 | F    | ribonucleotide binding                                          | 155        | 2313    | 2.6e-06 | 0.00017 |
| GO:0000166 | F    | nucleotide binding                                              | 165        | 2531    | 5.4e-06 | 0.00031 |
| GO:0004713 | F    | protein tyrosine kinase activity                                | 62         | 751     | 1.7e-05 | 0.00077 |
| GO:0016798 | F    | hydrolase activity, acting on glycosyl bonds                    | 37         | 363     | 1.6e-05 | 0.00077 |
| GO:0004553 | F    | hydrolase activity, hydrolyzing O-glycosyl compounds            | 36         | 348     | 1.6e-05 | 0.00077 |
| GO:0004888 | F    | transmembrane receptor activity                                 | 26         | 213     | 1.9e-05 | 0.00082 |
| GO:0004872 | F    | receptor activity                                               | 26         | 215     | 2.2e-05 | 0.00089 |
| GO:0060089 | F    | molecular transducer activity                                   | 31         | 285     | 2.5e-05 | 0.0009  |
| GO:0004871 | F    | signal transducer activity                                      | 31         | 285     | 2.5e-05 | 0.0009  |
| GO:0016740 | F    | transferase activity                                            | 137        | 2103    | 3.7e-05 | 0.0013  |
| GO:0003964 | F    | RNA-directed DNA polymerase activity                            | 16         | 101     | 5.1e-05 | 0.0016  |
| GO:0034061 | F    | DNA polymerase activity                                         | 17         | 115     | 6.5e-05 | 0.002   |
| GO:0016265 | P    | death                                                           | 38         | 377     | 1.6e-05 | 0.0042  |
| GO:0012501 | P    | programmed cell death                                           | 36         | 357     | 2.6e-05 | 0.0042  |
| GO:0023052 | P    | signaling                                                       | 45         | 486     | 2e-05   | 0.0042  |

Continued on next page

Table S6 – continued from previous page

| GO acc     | Type | Term                                                   | Query Item | BG Item | p-value | FDR    |
|------------|------|--------------------------------------------------------|------------|---------|---------|--------|
| GO:0008219 | P    | cell death                                             | 38         | 377     | 1.6e-05 | 0.0042 |
| GO:0006915 | P    | apoptosis                                              | 36         | 357     | 2.6e-05 | 0.0042 |
| GO:0006278 | P    | RNA-dependent DNA replication                          | 16         | 101     | 5.1e-05 | 0.0068 |
| GO:0016773 | F    | phosphotransferase activity, alcohol group as acceptor | 75         | 1072    | 0.00035 | 0.0097 |
| GO:0003824 | F    | catalytic activity                                     | 344        | 6355    | 0.00034 | 0.0097 |
| GO:0016779 | F    | nucleotidyltransferase activity                        | 23         | 217     | 0.00037 | 0.01   |
| GO:0004672 | F    | protein kinase activity                                | 70         | 989     | 0.0004  | 0.01   |
| GO:0006260 | P    | DNA replication                                        | 19         | 150     | 0.00016 | 0.01   |
| GO:0002376 | P    | immune system process                                  | 20         | 165     | 0.00018 | 0.015  |
| GO:0006955 | P    | immune response                                        | 20         | 165     | 0.00018 | 0.015  |
| GO:0045087 | P    | innate immune response                                 | 20         | 165     | 0.00018 | 0.015  |
| GO:0016301 | F    | kinase activity                                        | 74         | 1089    | 0.00082 | 0.02   |
| GO:0023046 | P    | signaling process                                      | 36         | 409     | 0.00032 | 0.021  |
| GO:0023060 | P    | signal transmission                                    | 36         | 409     | 0.00032 | 0.021  |
| GO:0005488 | F    | binding                                                | 371        | 7025    | 0.0011  | 0.025  |
| GO:0005215 | F    | transporter activity                                   | 50         | 682     | 0.0013  | 0.03   |
| GO:0007165 | P    | signal transduction                                    | 33         | 378     | 0.00063 | 0.039  |
| GO:0007154 | P    | cell communication                                     | 14         | 107     | 0.00083 | 0.048  |

Table S7: Total gene expression in peach (*P. persica*) candidate genes as a ratio of fruit expression to mean non-fruit expression and permutation p-values.

| <b>Statistic</b> | Total expression | <i>p</i> |
|------------------|------------------|----------|
| Tajima's D       | 1776.858         | 0.619    |
| Zeng's E         | 3294.259         | 0.088    |
| Fay & Wu's H     | 1647.483         | 0.725    |
| $\theta_\pi$     | 1535.743         | 0.818    |
| $F_{ST}$         | 4137.200         | 0.016    |

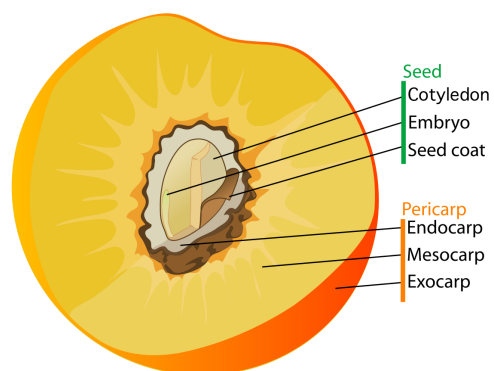

Figure S1: Peach and almond fruit and seed anatomy.

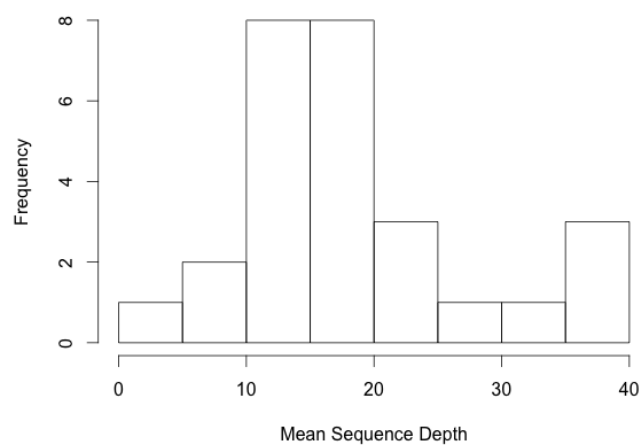

Figure S2: Mean mapped depth of peach and almond sequences used in this analysis filtered for mapping quality (MAPQ) scores  $\geq 30$  and base quality scores  $\geq 20$ .



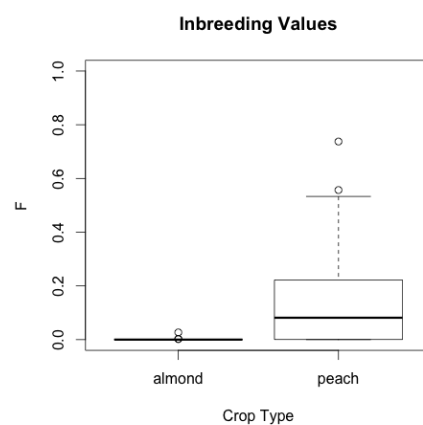

Figure S3: Distribution of inbreeding values for almond and peach samples studied.

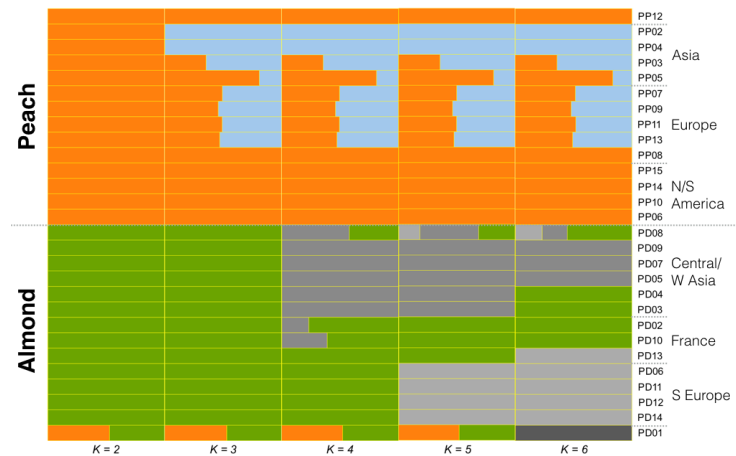

Figure S4: Increasing the assumed clusters to  $K=6$  (right) places PD01, the almond-peach  $F_1$  hybrid collected from Kharkiv Market, Ukraine, into a unique sub-population. It also shifts the assignments of samples PD13, PD03, and PD04 to different sub-populations, when compared to their assignments in  $K=5$  (second from right).

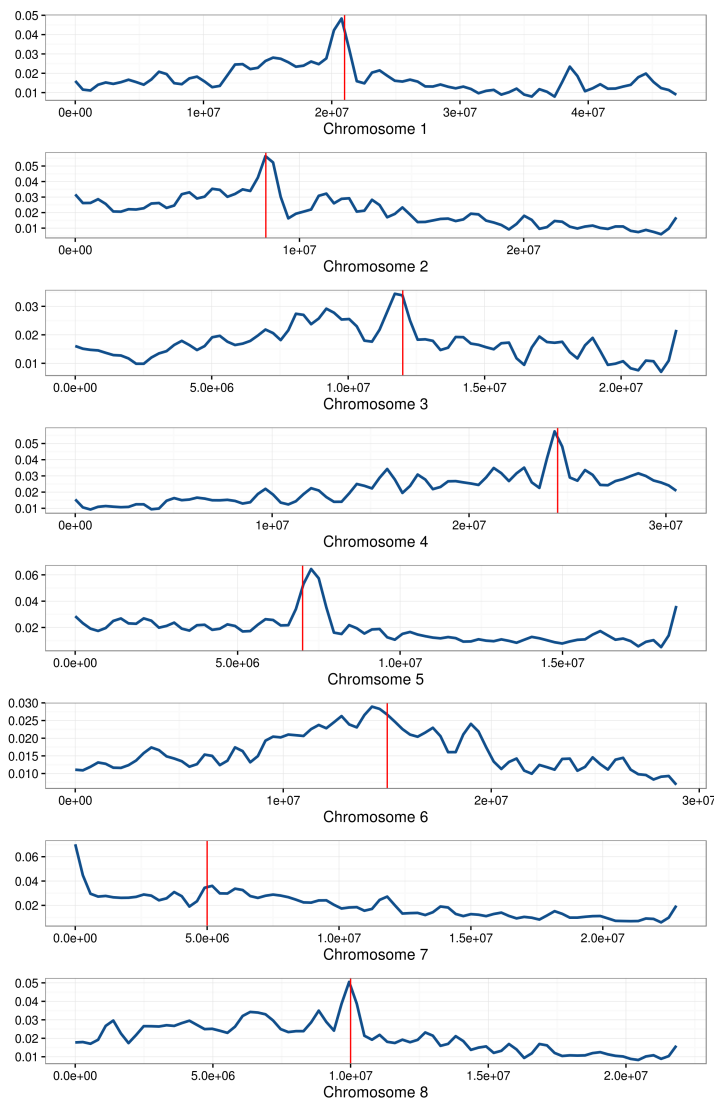

Figure S5: Nucleotide diversity ( $\theta_{\pi}$ ) in almond for each chromosome. The vertical red line indicates the approximate location of the centromere.

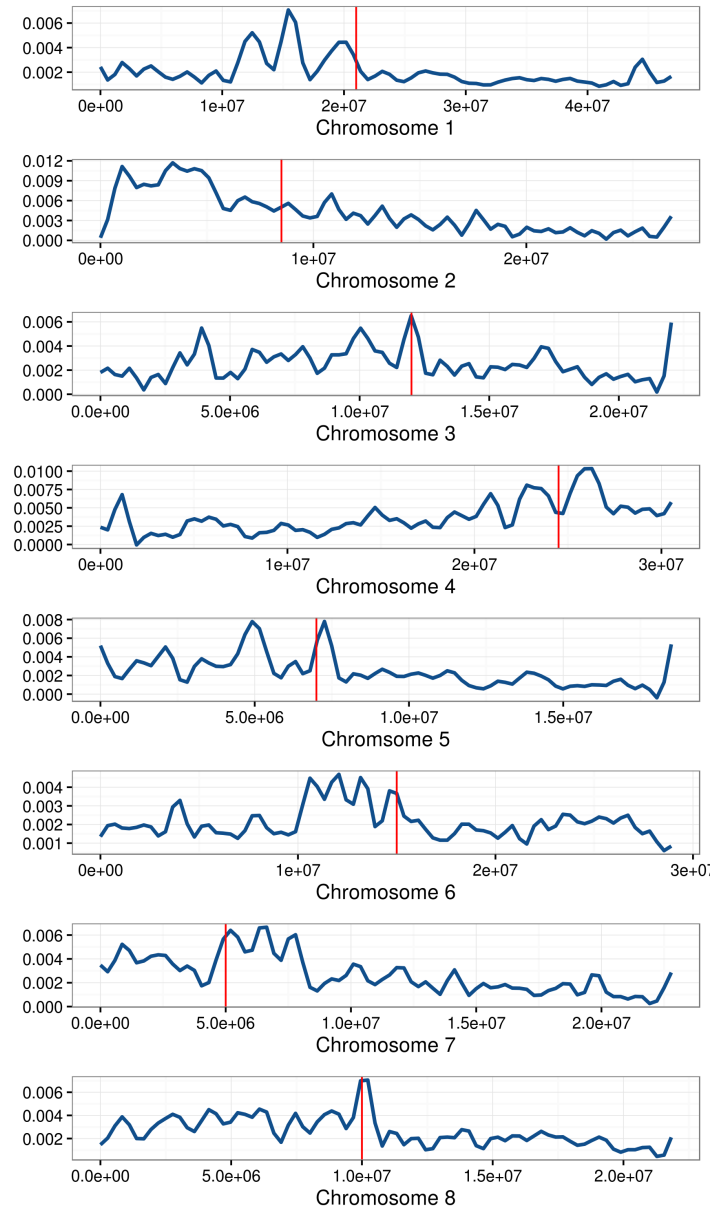

Figure S6: Nucleotide diversity ( $\theta_{\pi}$ ) in peach for each chromosome. The vertical red line indicates the approximate location of the centromere.

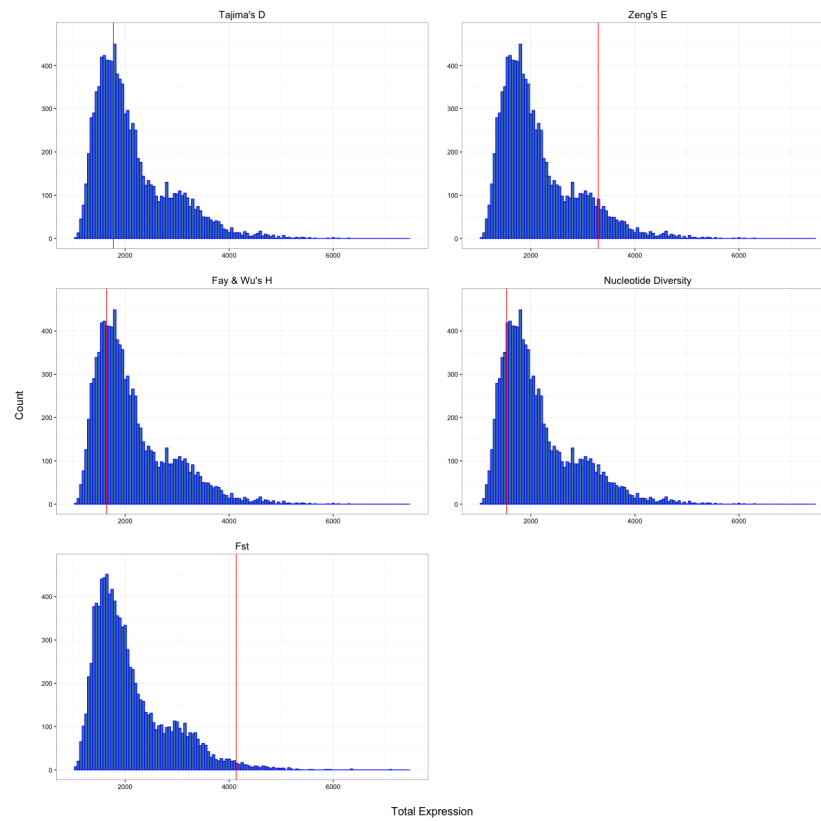

Figure S7: Expression of the ratio of fruit to the non-fruit tissue mean for candidate peach genes based on (l-r) top 5% of  $F_{ST}$ , bottom 5% of  $\theta_{\pi}$ ,  $E$ ,  $D$  and  $H$
